# Supplementary material for: Structural and photocatalytic properties of Pd-deposited semiconductors with different morphology
Source: Royal Society of Chemistry journal article supplement (doi:10.1039/c7ra11080d), 2017-01-01
Supplement: c7ra11080d1.pdf [file c7ra11080d1.pdf]

### Electronic Supplementary Information

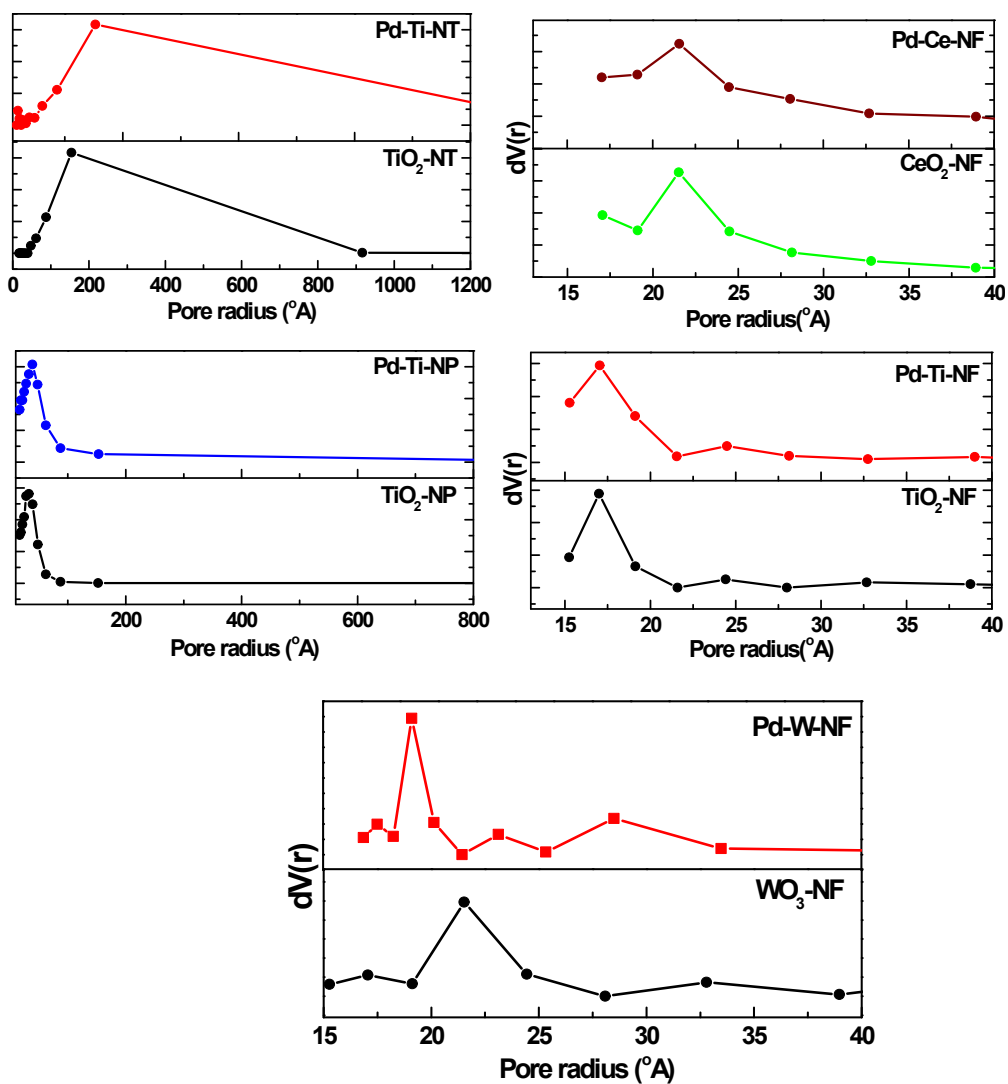

**Fig. S1:** Pore size distribution patterns of the bare and Pd deposited semiconductor samples

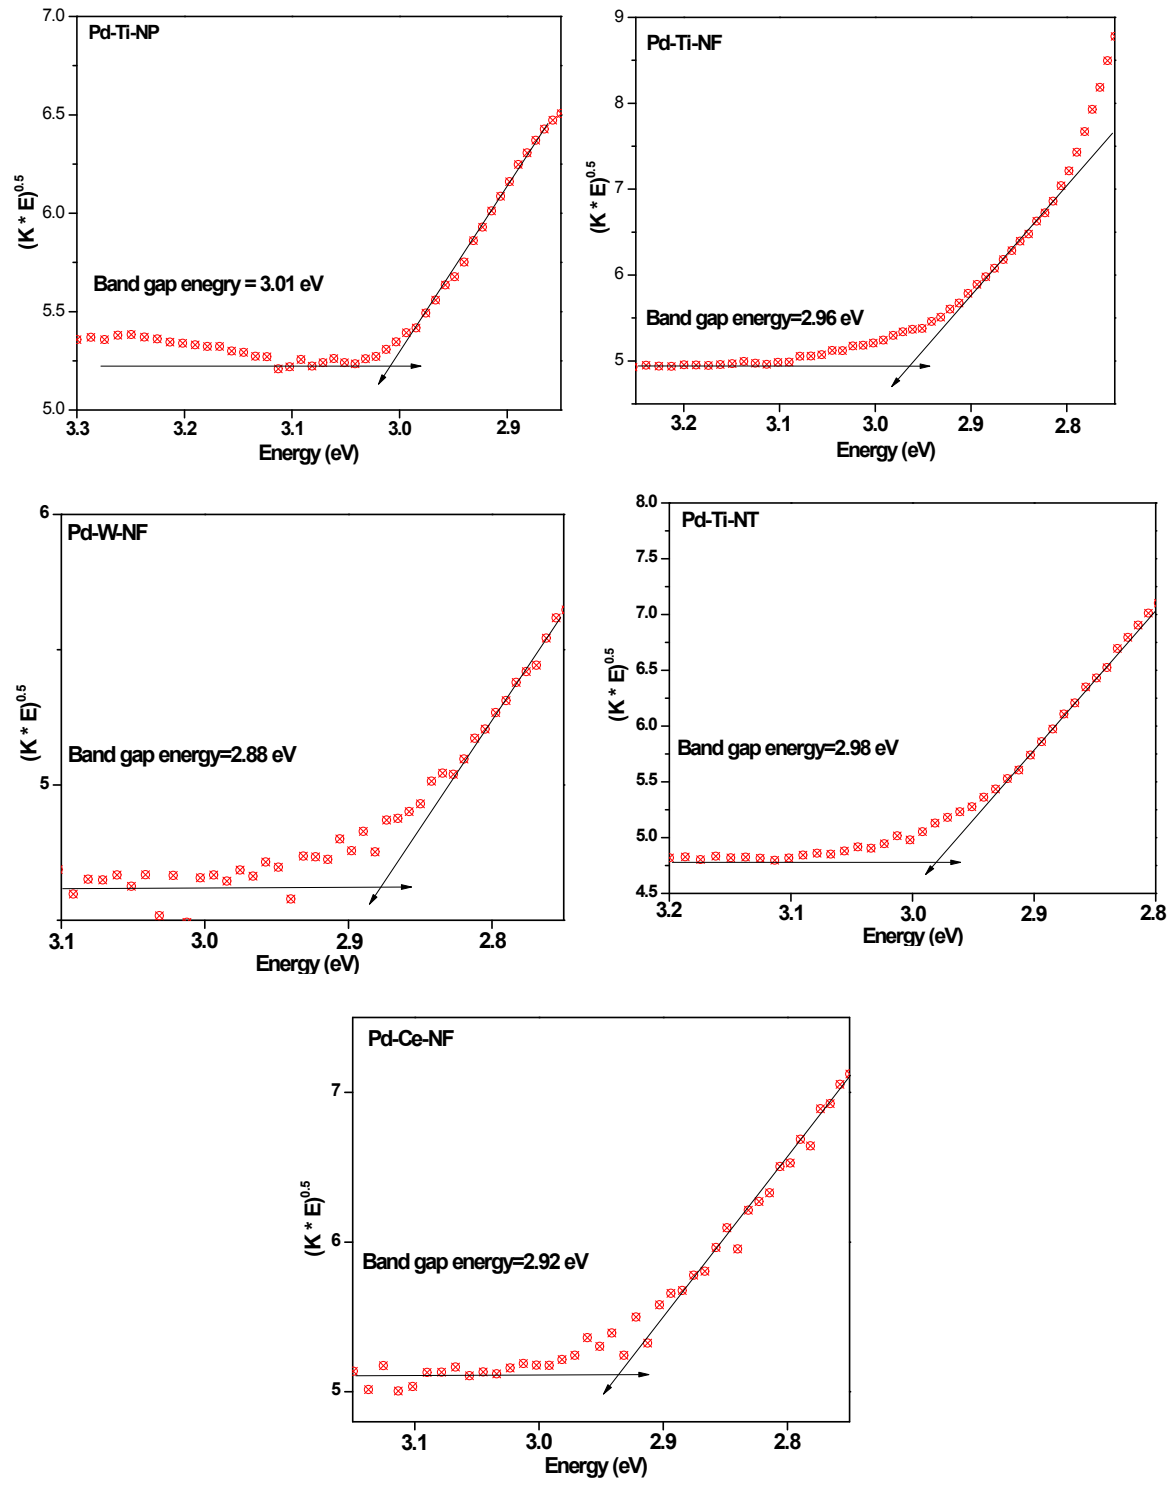

Fig. S2: Band gap energy measurements for Pd-deposited semiconductor samples

## Calculation of the theoretical photocurrent of Pd-deposited semiconductor samples

The single photon energy is calculated from Equation S1

$$E(\lambda) = h \times C/\lambda \quad (\text{S1})$$

Where  $E(\lambda)$  is the photon energy (J),  $h$  is Planck's constant ( $6.626 \times 10^{-34}$  J s),  $C$  is the speed of light ( $3 \times 10^8$  m s<sup>-1</sup>) and  $\lambda$  is the photon wavelength (m).

The UV photon flux is then calculated according to Equation S2

$$Flux(\lambda) = P(\lambda)/E(\lambda) \quad (\text{S2})$$

Where  $Flux(\lambda)$  is the UV light photon flux (m<sup>-2</sup> s<sup>-1</sup> nm<sup>-1</sup>), and  $P(\lambda)$  is the UV light flux (W m<sup>-2</sup> nm<sup>-1</sup>).

The theoretical maximum photocurrent density under UV light illumination,  $J_{max}$  (A m<sup>-2</sup>), is then calculated by integrating the UV photon flux, shown in Equation S3:

$$J_{max} = e \times \int_{\lambda_2}^{\lambda_1} Flux(\lambda) d\lambda \quad (\text{S3})$$

Where  $\lambda_1$  is the absorption edge of semiconductor,  $\lambda_2$  is the lower limit of the UV irradiation, and  $e$  is the elementary charge of electron ( $1.602 \times 10^{-19}$  C).

The theoretical photocurrent for synthesized Pd deposited semiconductor samples were calculated accordingly.
